# Supplementary material for: Biogenic colourants in the textile industry – a promising and sustainable alternative to synthetic dyes
Source: Royal Society of Chemistry journal article supplement (doi:10.1039/d1gc02968a), 2021-11-19
Supplement: d1gc02968a1.pdf [file d1gc02968a1.pdf]

## Critical Review

Received 00th January 20xx,  
 Accepted 00th January 20xx

DOI: 10.1039/x0xx00000x

# Biogenic colourants in the textile industry – a promising and sustainable alternative to synthetic dyes

Richard Fried<sup>a</sup>, Ilinca Oprea<sup>b</sup>, Karin Fleck<sup>\*b</sup> and Florian Rudroff<sup>\*a</sup>

## Supplement

Table S1: Acute toxicity, bioactivity and predicted biodegradability of selected microbial dyes. Data was obtained from EPA CompTox database.

| Class/Name        | CAS no.    | Toxicity test type | Value acute toxicity       | Test species             | Ref | Predicted biodegradability half-life (days) | Confidence level in OPERA model | Bioassay activity                                                              | Colour index no.       |
|-------------------|------------|--------------------|----------------------------|--------------------------|-----|---------------------------------------------|---------------------------------|--------------------------------------------------------------------------------|------------------------|
| <b>Polyenes</b>   |            |                    |                            |                          |     |                                             |                                 |                                                                                |                        |
| β-Carotene (9)    | 7235-40-7  | LD <sub>50</sub>   | >5000 mg·kg <sup>-1</sup>  | rat (oral)               | 1   | 74.4                                        | 0.517                           | binding solute carrier transporter, antiviral, antioxidant                     | C.I. Food Orange 5     |
| Astaxanthin (10)  | 472-61-7   | LD <sub>50</sub>   | >20000 mg·kg <sup>-1</sup> | rat (oral)               | 2   | 44.4                                        | 0.514                           |                                                                                |                        |
| Azulene           | 275-51-4   | LD <sub>50</sub>   | 108 mg·kg <sup>-1</sup>    | mouse (intra-peritoneal) | 3   | 8.58                                        | 0.553                           |                                                                                |                        |
| Azulene           | 275-51-4   | LD <sub>50</sub>   | >3000 mg·kg <sup>-1</sup>  | mouse (oral)             | 3   |                                             |                                 |                                                                                |                        |
| Guaiazulene (11)  | 489-84-9   | LD <sub>50</sub>   | 525 mg·kg <sup>-1</sup>    | mouse (intra-peritoneal) | 4   | 2.5                                         | 0.73                            | binding nuclear receptors and histone enzymes                                  |                        |
| Guaiazulene (11)  | 489-84-9   | LD <sub>50</sub>   | 1220 mg·kg <sup>-1</sup>   | mouse (oral)             | 4   |                                             |                                 |                                                                                |                        |
| <b>Quinones</b>   |            |                    |                            |                          |     |                                             |                                 |                                                                                |                        |
| Actinorhodin (14) | 1397-77-9  |                    |                            |                          |     | 153                                         | 0.441                           |                                                                                |                        |
| Emodin (15)       | 518-82-1   | LD <sub>50</sub>   | 1000 mg·kg <sup>-1</sup>   | rat (oral)               | 5   | 44.6                                        | 0.481                           | ser-thr kinase, cyp1a2+2c9, microtubule assoc. protein, aldehyde dehydrogenase | C.I. Natural Yellow 14 |
| Monascin (20)     | 21516-68-7 |                    |                            |                          |     | 4.74                                        | 0.514                           |                                                                                |                        |
| <b>Indoles</b>    |            |                    |                            |                          |     |                                             |                                 |                                                                                |                        |

<sup>a</sup> Institute for Applied Synthetic Chemistry, TU Wien, Getreidemarkt 9, OC-163, 1060 Vienna, Austria

<sup>b</sup> VTL GmbH, Rudolf-von-Alt-Platz 4/13, 1030 Vienna, Austria

\* Correspondence may be addressed to Karin Fleck (karin.fleck@viennatextilelab.at) or Florian Rudroff (florian.rudroff@tuwien.ac.at).

|                             |             |                  |                            |                            |            |      |       |                                                               |                     |
|-----------------------------|-------------|------------------|----------------------------|----------------------------|------------|------|-------|---------------------------------------------------------------|---------------------|
| Violacein (26)              | 548-54-9    | LD <sub>50</sub> | 100 mg·kg <sup>-1</sup>    | mouse (intra-peritoneal)   | MSDS,<br>6 |      |       |                                                               |                     |
| Violacein (26)              | 548-54-9    | EC <sub>50</sub> | 560 mg·L <sup>-1</sup>     | <i>P. capsici</i> (fungus) | 7          |      |       |                                                               |                     |
| Oxyviolacein                |             | EC <sub>50</sub> | 460 mg·L <sup>-1</sup>     | <i>P. capsici</i> (fungus) | 7          |      |       |                                                               |                     |
| Oxyviolacein                |             | EC <sub>50</sub> | 2010 mg·L <sup>-1</sup>    | <i>R. solani</i> (fungus)  | 7          |      |       |                                                               |                     |
| Deoxyviolacein              | 5839-61-2   | EC <sub>50</sub> | 1730 mg·L <sup>-1</sup>    | <i>R. solani</i> (fungus)  | 7          |      |       |                                                               |                     |
| <b>Other N-heterocycles</b> |             |                  |                            |                            |            |      |       |                                                               |                     |
| Rubrolone (41)              | 65445-21-8  | LD <sub>50</sub> | 930 mg·kg <sup>-1</sup>    | mouse (intra-peritoneal)   | 8          | 142  | 0.449 |                                                               |                     |
| Rubrolone (41)              | 65445-21-8  | LD <sub>50</sub> | >4000 mg·kg <sup>-1</sup>  | mouse (oral)               | 8          |      |       |                                                               |                     |
| <b>Pyrroles</b>             |             |                  |                            |                            |            |      |       |                                                               |                     |
| Prodigiosin (31)            | 82-89-3     | LD <sub>50</sub> | 18 mg·kg <sup>-1</sup>     | mouse (intra-peritoneal)   | 9          | 3.35 | 0.595 | x                                                             | x                   |
| Undecyl-prodigiosin         | 52340-48-4  | LD <sub>50</sub> | 26.7 mg·kg <sup>-1</sup>   | mouse (intravenous)        | 6          |      |       |                                                               |                     |
| Prodigiosin-25C             | 14960-80-6  | LD <sub>50</sub> | 7.1 mg·kg <sup>-1</sup>    | mouse (intra-peritoneal)   | 10         |      |       |                                                               |                     |
| <b>Phenazines</b>           |             |                  |                            |                            |            |      |       |                                                               |                     |
| Pyocyanin (35)              | 85-66-5     |                  | acute toxicity             |                            | MSDS       | 3.35 | 0.623 |                                                               |                     |
| Lavanducyanin               | 122228-60-8 | LD <sub>50</sub> | >100 mg·kg <sup>-1</sup>   | mouse (intra-peritoneal)   | 11         | 47.8 | 0.459 |                                                               |                     |
| <b>Flavins</b>              |             |                  |                            |                            |            |      |       |                                                               |                     |
| Riboflavin                  | 83-88-5     | LD <sub>50</sub> | 560 mg·kg <sup>-1</sup>    | rat (intra-peritoneal)     | 12         | 6.73 | 0.501 | binding G-protein subunit and various enzymes (as a cofactor) | C.I. Food Yellow 15 |
| Riboflavin                  | 83-88-5     | LD <sub>50</sub> | >10000 mg·kg <sup>-1</sup> | rat (oral)                 | 12         |      |       |                                                               |                     |

<sup>a</sup> Predicted biodegradability half-life comes with a confidence level index (ranging from 0 to 1) to decide about the reliability of this prediction.

Table S2: Acute toxicity, bioactivity and predicted biodegradability of selected synthetic dyes. Data was obtained from EPA CompTox database.

| Class/Name/<br>Colour index no.                       | CAS no.    | Toxicity test type | Value acute toxicity      | Test species           | Ref | Predicted biodegradability half-life (days) | Confidence level in OPERA model <sup>a</sup> | Bioassay activity                       |
|-------------------------------------------------------|------------|--------------------|---------------------------|------------------------|-----|---------------------------------------------|----------------------------------------------|-----------------------------------------|
| <b>Azo</b>                                            |            |                    |                           |                        |     |                                             |                                              |                                         |
| Reactive Red 1                                        | 17752-85-1 |                    |                           |                        |     | 15.3                                        | 0.398                                        |                                         |
| Direct Black 80 (Na <sup>+</sup> salt or free acid)   | 8003-69-8  | LC <sub>50</sub>   | 180 mg·L <sup>-1</sup>    | fathead minnow (fish)  |     | 113                                         | 0.443                                        | predicted androgen receptor binding     |
| <b>Polycyclics</b>                                    |            |                    |                           |                        |     |                                             |                                              |                                         |
| Cu-phthalocyanine                                     | 147-14-8   | LD <sub>50</sub>   | 10000 mg·kg <sup>-1</sup> | mouse (oral)           | 13  | 153                                         | 0.519                                        | predicted androgen receptor binding     |
| Cu-phthalocyanine                                     | 147-14-8   | LC <sub>50</sub>   | 100 mg·L <sup>-1</sup>    | zebrafish              | 13  |                                             |                                              |                                         |
| <b>Oxazines</b>                                       |            |                    |                           |                        |     |                                             |                                              |                                         |
| Basic Blue 12 (Nile Blue) (8)                         | 2381-85-3  | LD <sub>50</sub>   | 18 mg·kg <sup>-1</sup>    | mouse (intravenous)    | 14  | 45.3                                        | 0.495                                        |                                         |
| <b>Anthraquinones</b>                                 |            |                    |                           |                        |     |                                             |                                              |                                         |
| Mordant Red 3 (Na <sup>+</sup> salt or free acid) (3) | 130-22-3   | LD <sub>50</sub>   | 70 mg·kg <sup>-1</sup>    | mouse (intravenous)    | 15  | 8.83                                        | 0.569                                        | human phosphoglycerate-mutase inhibitor |
| Mordant Red 3 (Na <sup>+</sup> salt or free acid) (3) | 130-22-3   | LC <sub>50</sub>   | 250 mg·L <sup>-1</sup>    | japanese medaka (fish) | 16  |                                             |                                              |                                         |
| Pigment Yellow 108 (4)                                | 4216-01-7  |                    |                           |                        |     | 149                                         | 0.459                                        |                                         |

| Triaryl-carbonium                         |          |                  |                          |                           |               |      |       |                                                                    |
|-------------------------------------------|----------|------------------|--------------------------|---------------------------|---------------|------|-------|--------------------------------------------------------------------|
| Basic Green 4<br>(Malachite green)<br>(7) | 569-64-2 | LD <sub>50</sub> | 80 mg·kg <sup>-1</sup>   | mouse (oral)              | <sup>17</sup> | 4.04 | 0.774 | binding to many human receptors                                    |
| Basic Green 4 (7)                         | 569-64-2 | LC <sub>50</sub> | 0.6 mg·L <sup>-1</sup>   | japanese medaka<br>(fish) | <sup>18</sup> |      |       |                                                                    |
| Indoles                                   |          |                  |                          |                           |               |      |       |                                                                    |
| Acid Blue 74<br>(Indigo Carmine)          | 860-22-0 | LD <sub>50</sub> | 2500 mg·kg <sup>-1</sup> | mouse (oral)              | <sup>19</sup> | 15.4 | 0.429 | binding oestrogen receptor1<br>and inhibitor of several<br>enzymes |

<sup>a</sup> Predicted biodegradability half-life comes with a confidence level index (ranging from 0 to 1) to decide about the reliability of this prediction.

## References

1. Sigma-Aldrich, Safety Data Sheet beta-carotene, <https://www.sigmaaldrich.com/AT/en/sds/sigma/c9750>, (accessed 14.8.2021).
2. T. Niu, J. Zhou, F. Wang, R. Xuan, J. Chen, W. Wu and H. Chen, *Regul. Toxicol. Pharmacol.*, 2020, **115**, 104695-104702.
3. *Drugs Japan*, 1982, **6**, 13.
4. (a) H. Yamasaki, S. Irino, A. Uda, K. Uchida, H. Ohno, N. Saito, K. Kondo, K. Jinzenji and T. Yamamoto, *Folia Pharmacol. Jpn.*, 1958, **54**, 362-377; (b) H. Yamasaki, K. Kondo, T. Uda, T. Yamamoto and K. Endo, *Acta Med. Okayama*, 1961, **15**, 347-366.
5. *EFSA OpenFoodTox CAS 518-82-1*.
6. B. Janos, *CRC: Cleveland, OH*, 1981, **5**.
7. H. Wang, F. Wang, X. Zhu, Y. Yan, X. Yu, P. Jiang and X.-H. Xing, *Biochem. Eng. J.*, 2012, **67**, 148-155.
8. N. J. Palleroni, K. E. Reichelt, D. Mueller, R. Epps, B. Tabenkin, D. N. Bull, W. Schuep and J. Berger, *J. Antibiot. (Tokyo)*, 1978, **31**, 1218-1225.
9. *Jpn. Kokai Tokkyo Koho, #80-162768*.
10. R. F. Tsuji, J. Magae, M. Yamashita, K. Nagai and M. Yamasaki, *J. Antibiot. (Tokyo)*, 1992, **45**, 1295-1302.
11. O. Nakayama, M. Yagi, M. Tanaka, S. Kiyoto, M. Okuhara and M. Kohsaka, *J. Antibiot. (Tokyo)*, 1989, **42**, 1221-1229.
12. K. UNNA and J. G. GRESLIN, *J. Pharmacol. Exp. Ther.*, 1942, **76**, 75-80.
13. *ECHA UICLID CAS 147-14-8*.
14. G. A. Luty, *Toxicol. Appl. Pharm.*, 1978, **44**, 225-249.
15. B. A. Rahn and S. M. Perren, *Experientia*, 1972, **28**, 180-180.
16. *EPA EcoTox CAS 130-22-3*.
17. N. Brock and A. Erhardt, *Arznei.-Forschung*, 1951, **1**, 1-5.
18. *EPA CompTox, CAS 569-64-2*.
19. *Sci. Pharmat.*, 1979, **47**.
